# Supplementary material
Source: publisher figshare collection journal article supplement (https://acs.figshare.com/ndownloader/files/4545982)
Supplement: Supplementary file 1 [file 4545982]

---

**Supporting information for**

# **Full-Visible-Spectrum Emitters from Pyrolysis of Soluble Si-Si Bonded Network Polymers**

5

**Michiya Fujiki,<sup>\*,†</sup> Yoshiki Kawamoto,<sup>†</sup> Masahiko Kato,<sup>†</sup> Yuji Fujimoto,<sup>†</sup> Tomoki Saito,<sup>†</sup> Shin-ichi Hososhima,<sup>†</sup> and Giseop Kwak<sup>\*,‡</sup>**

<sup>†</sup> *Graduate School of Materials Science, Nara Institute of Science and Technology,*

<sup>10</sup> *8916-5 Takayama, Ikoma, Nara 630-0036, Japan, and*

<sup>‡</sup> *Department of Polymer Science, Kyungpook, National UniVersity, 1370 Sankyuk-dong, Buk-gu, Daegu 702-701, Korea*

<sup>\*</sup> Corresponding author. Fax: 81-743-72-6049 (M.F.); 82-53-950-6623 (G.K.).

<sup>15</sup> Tel: 81-743-72-6040 (M.F.); 82-53-9507758 (G.K.). E-mail: fujikim@ms.naist.jp.  
(M.F.); gkwak@knu.ac.kr (G.K.).

<sup>†</sup> Nara Institute of Science and Technology.

<sup>‡</sup> Kyungpook National University.

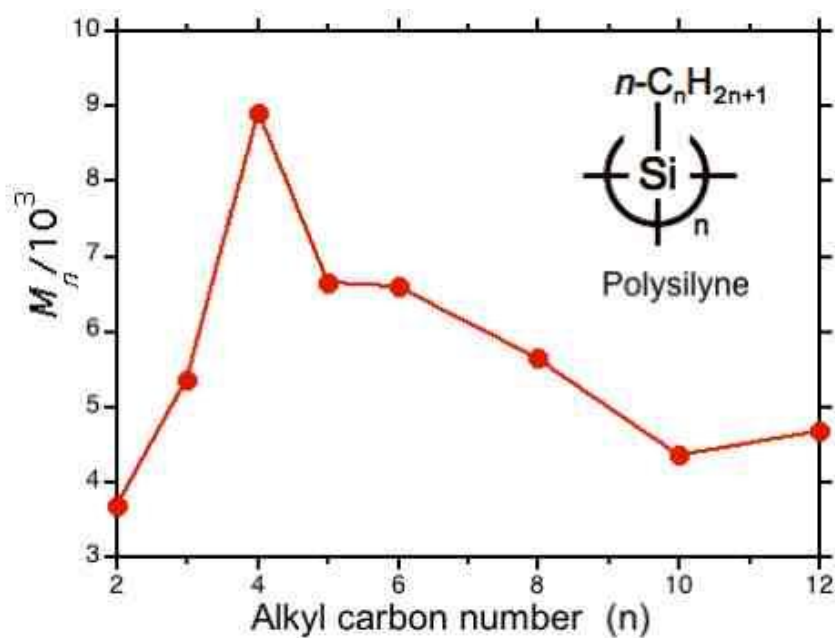

**Figure S1.** The molecular weights of silicon network polymer (SNP) prepared similarly to  $n$ -BSNP. In the case of  $\text{CF}_3(\text{CH}_2)_2\text{-SNP}$ ,  $n$ -nonane was used as a polymerization solvent.

5

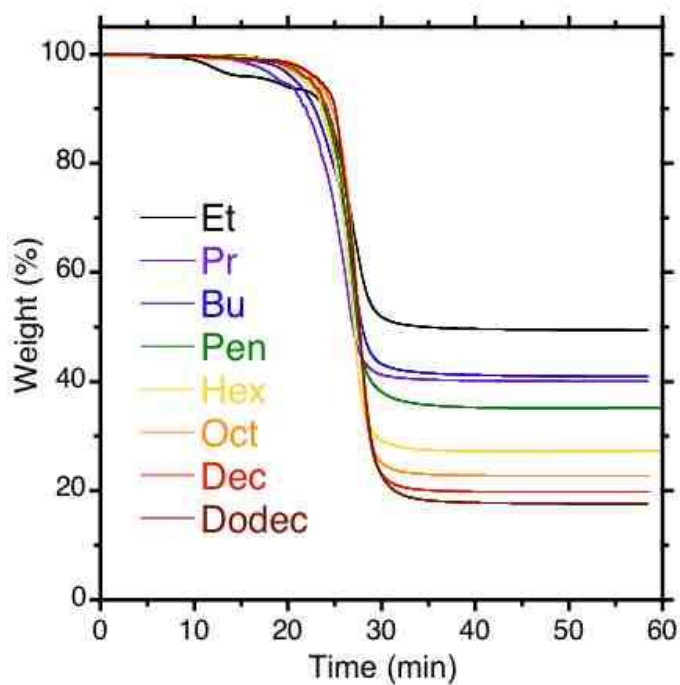

**Figure S2.** Weight loss data for eight SNPs with different alkyl chains at 500 °C as a function of time in  $\text{N}_2$  atmosphere.

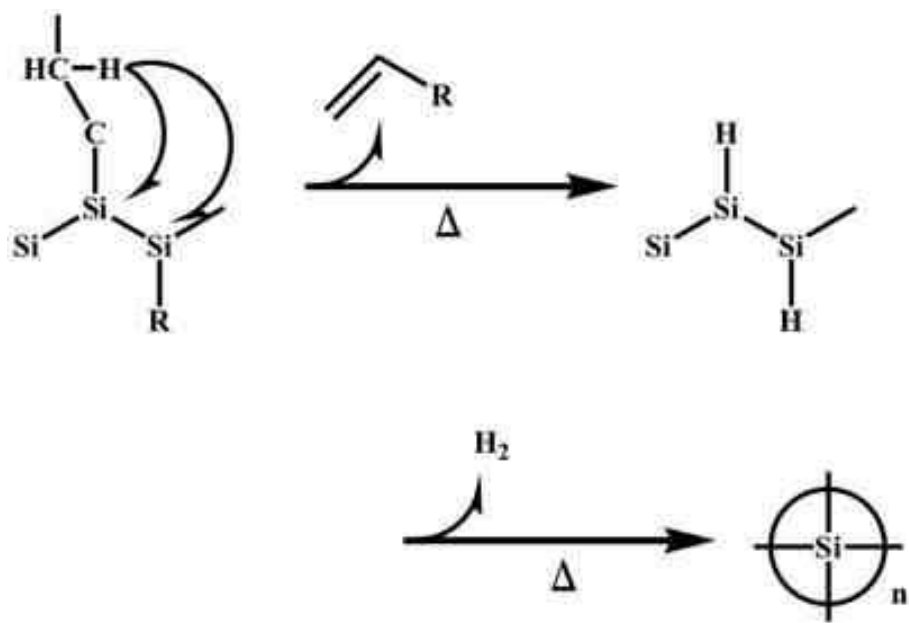

#### Operation of sealing and pyrolysis

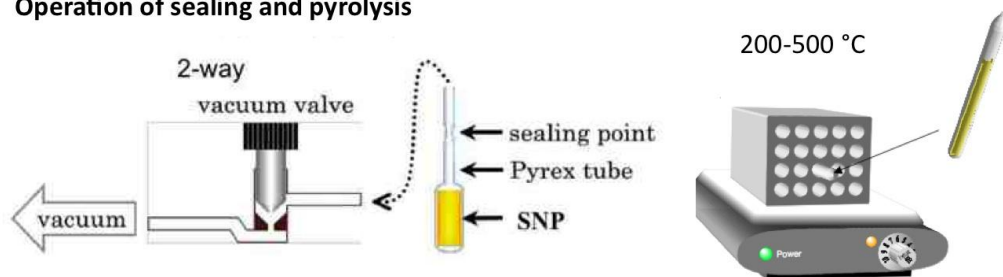

5

**Figure S1.** Mechanism of  $\beta$ -H elimination of SNP and simple apparatus for pyrolysis of SNP in a sealed tube.

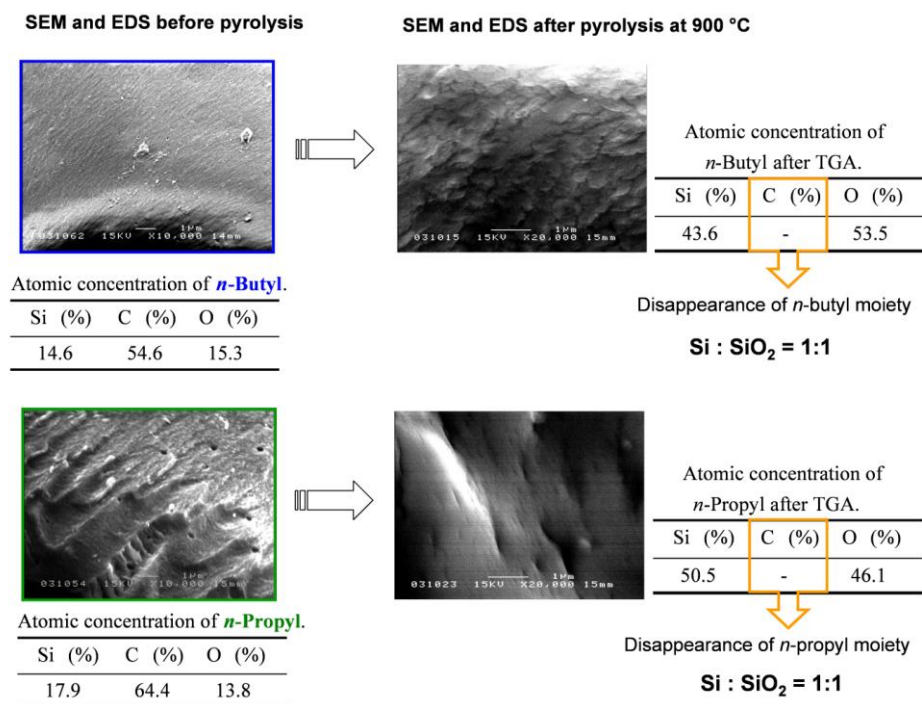

**Figure S3.** Surface analysis by SEM photographs and EDS of *n*-propyl-SNP and *n*-BSNP before and after pyrolysis at 900 °C.

5

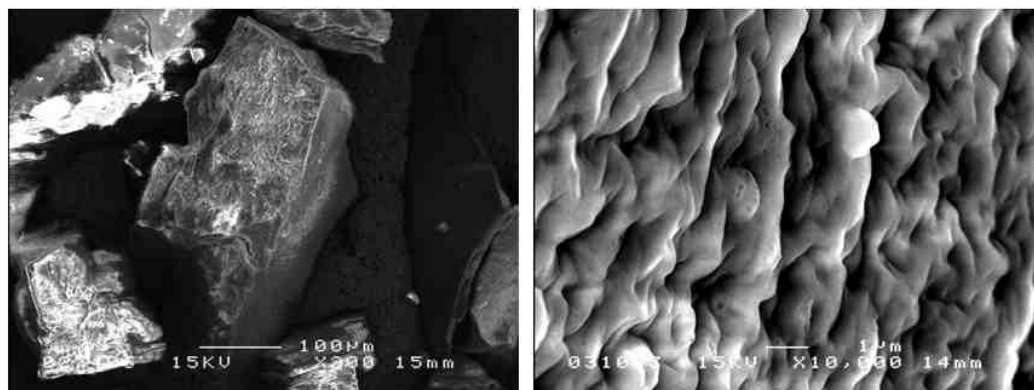

**Figure S4.** SEM photographs of *n*-propyl-SNP after pyrolysis at 900 °C in N<sub>2</sub> atmosphere.

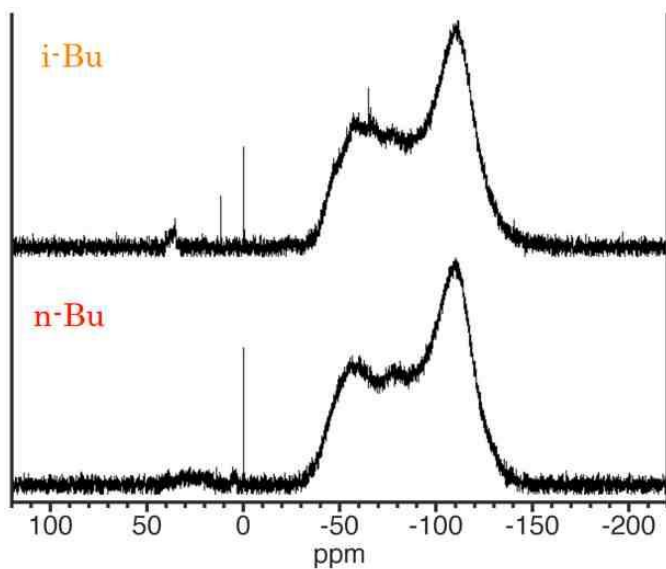

**Figure S5.**  $^{29}\text{Si}$ -FT-NMR of *n*-BSNP and *i*-BSNP ( $\text{CDCl}_3$ , 25 °C).

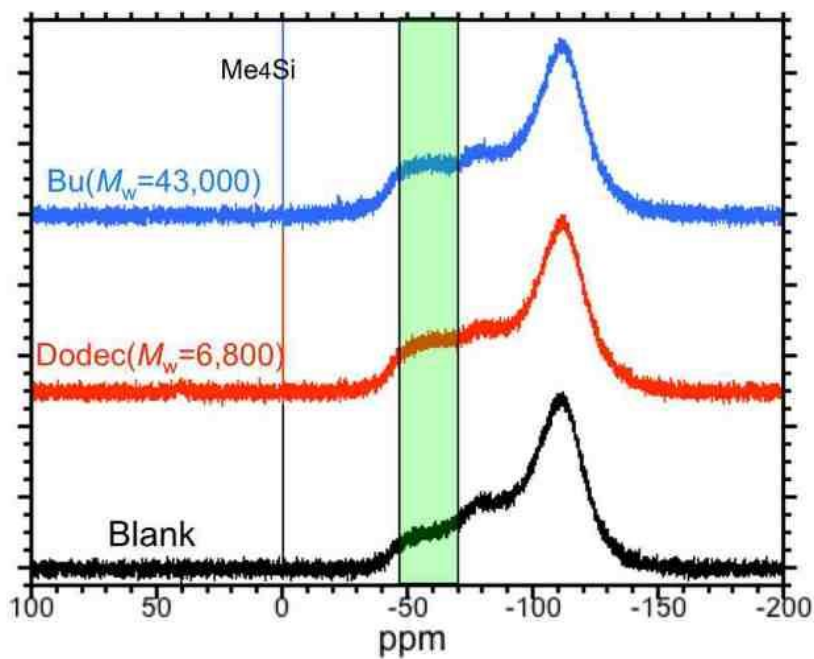

**Figure S6.**  $^{29}\text{Si}$ -NMR of *n*-BSNP and *n*-dodecylSNP ( $\text{CDCl}_3$ , 25 °C). A very broad, humped Si-NMR signal around -50 ppm (green bar) implies very limited motion of Si-Si bonded networks. Broad  $^{29}\text{Si}$ -NMR signals around -50, -80 ppm and -110 ppm are due to the glass of the NMR tube and probe.

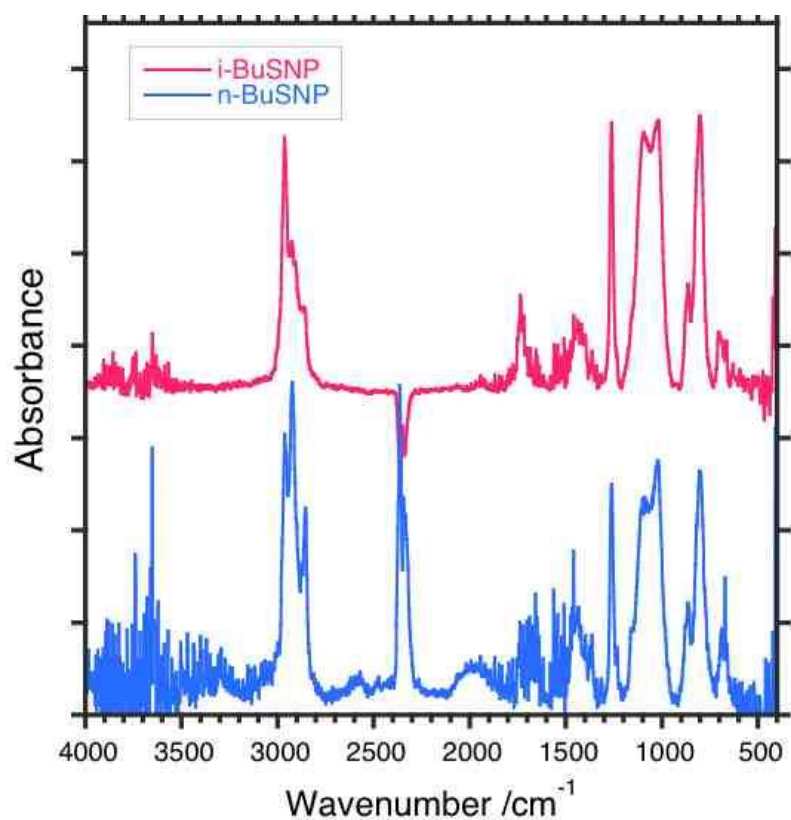

**Figure S7.** FT-IR spectra of *n*-BSNP and *i*-BSNP cast on a KBr plate.

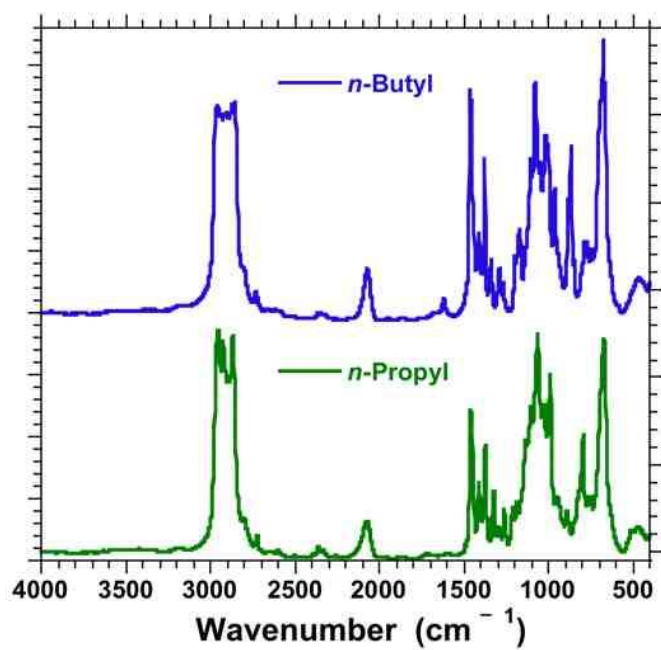

**Figure S8.** FT-IR spectra of *n*-BSNP and *n*-propyl SNP on a KBr plate.

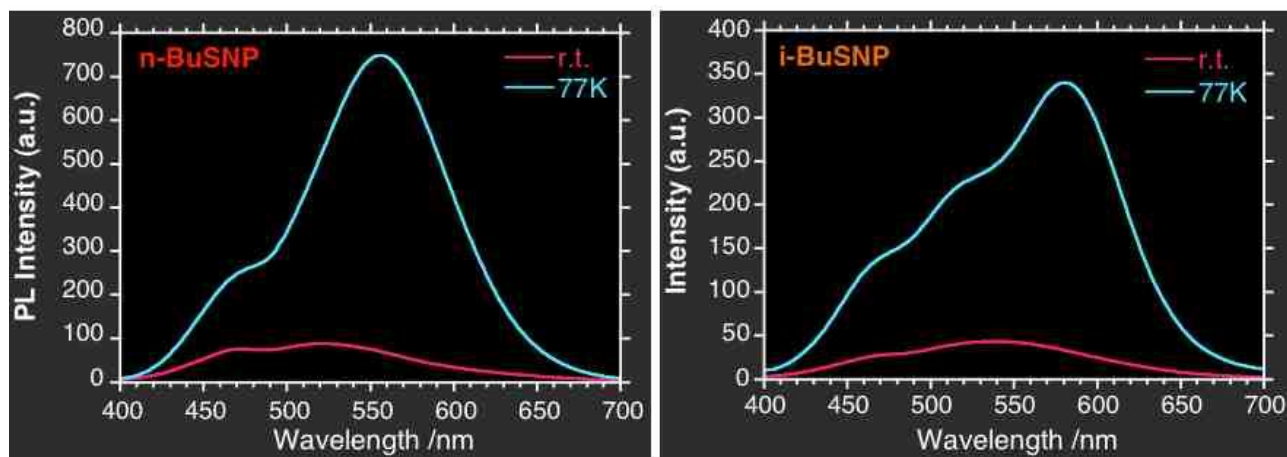

**Figure S9.** Change in PL intensity (under 360 nm excitation). Left, virgin *n*-BSNP film at 77 K and room temperature; right, *i*-BSNP film at 77 K and room temperature.

5

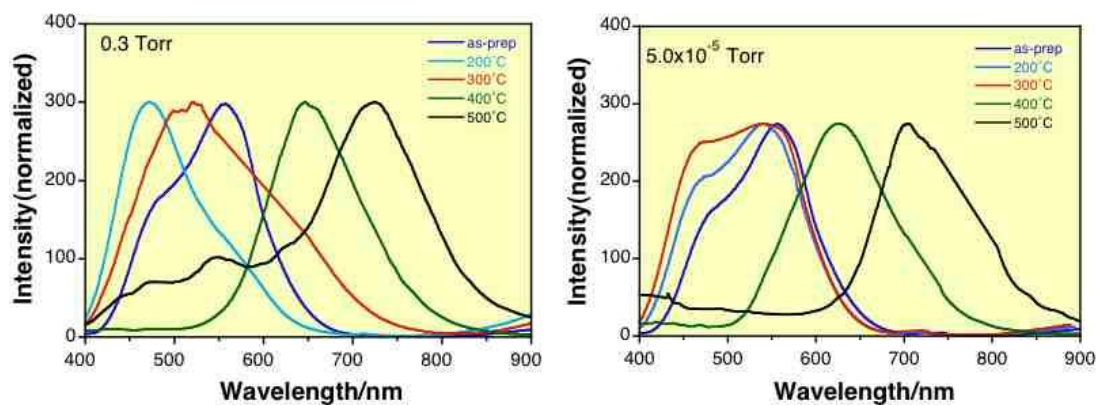

**Figure S10.** A comparison of PL spectra of *n*-BSNP treated with five different temperatures in two  
10 different vacuum conditions: Left at  $\sim 3 \times 10^{-1}$  Torr and right at  $\sim 5 \times 10^{-5}$  Torr.



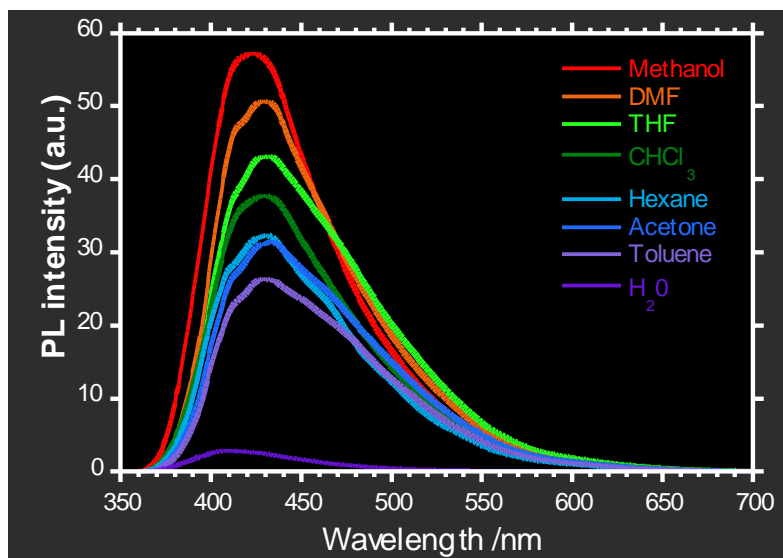

**Figure S11.** Change in PL intensity of the air-exposed *nc*-Si particles dispersed in solvent: from top to bottom, dimethylformamide, methanol, tetrahydrofuran, chloroform, toluene, acetone, and water.

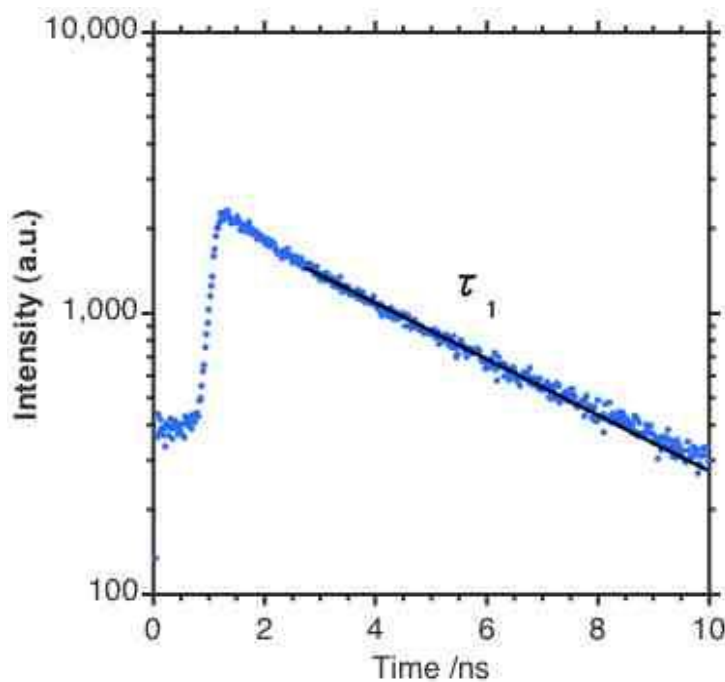

**Figure S12.** PL decay curve monitored at 560–640 nm (excited at 370 nm, 0.5 mW, pulse width 3 nm, pulse duration 10 nsec) of the air-exposed *nc*-Si particles (pyrolyzed at 500 °C, 90 min) dispersed in *n*-hexane at room temperature.



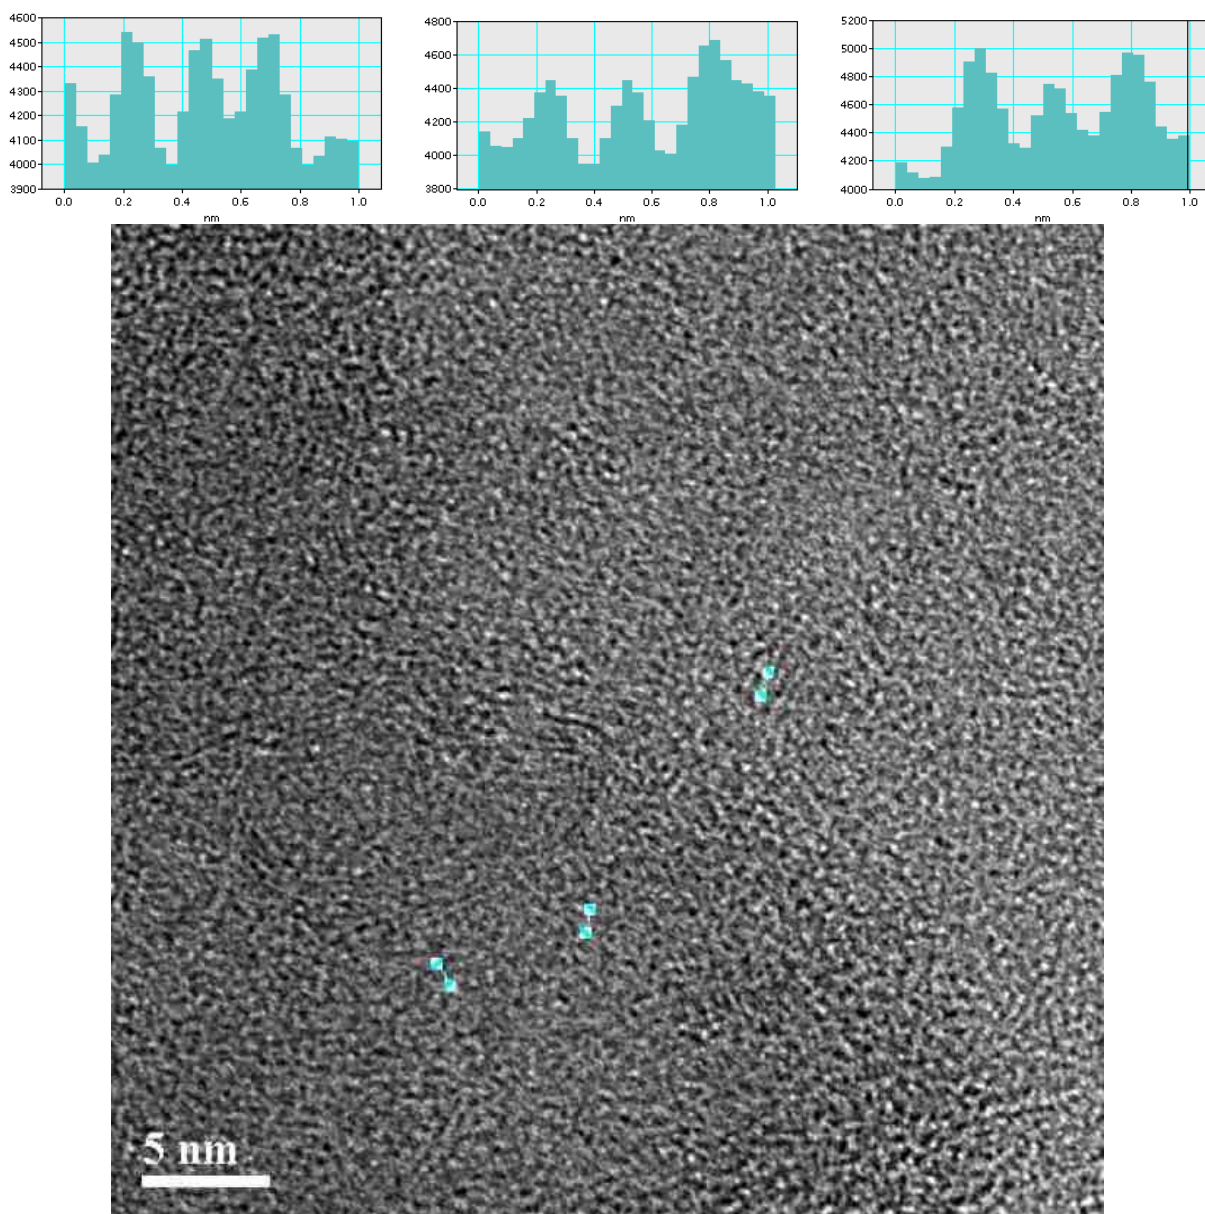

**Figure S13.** A highly magnified HRTEM image of the air-exposed *nc*-Si particles (the major portions may be ultrafine particles  $\sim 1$  nm). (All plots surface profiles in locations indicated on HRTEM images).

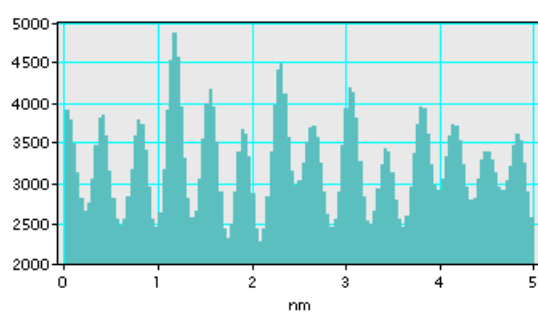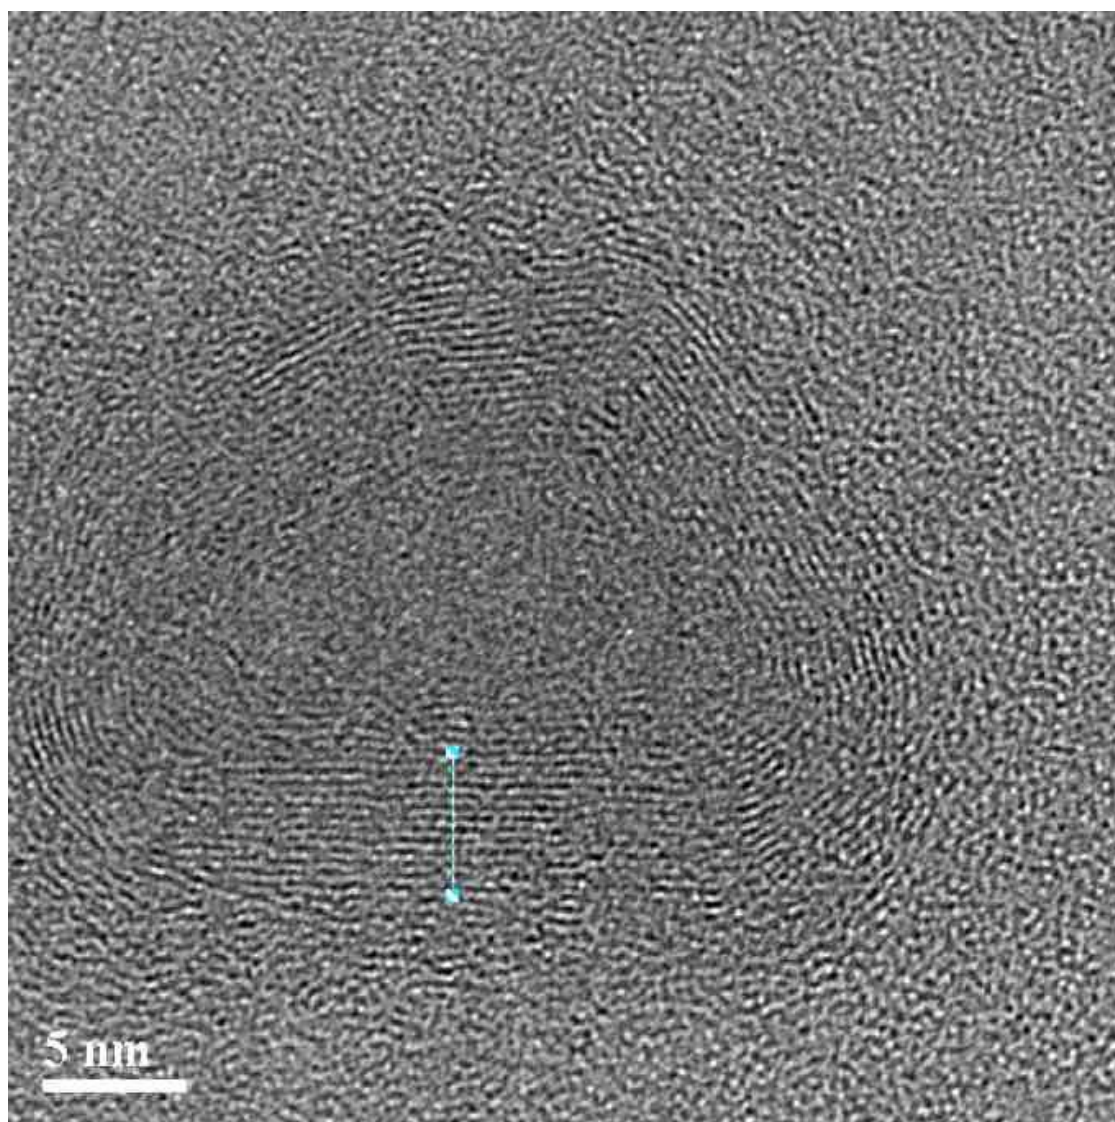

Figure S14. A highly magnified HRTEM image of the air-exposed *nc*-Si particles (baum-küchen-like, multi-layered structures, circular shapes with  $\sim 0.34$  nm spacing). (Surface profile at indicated location).

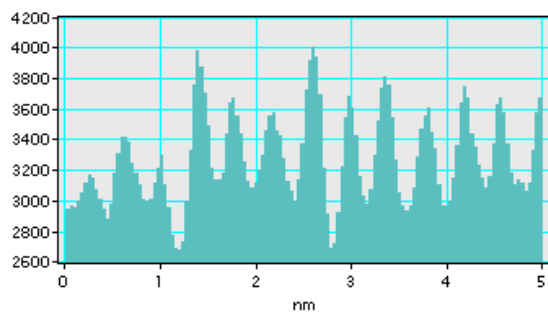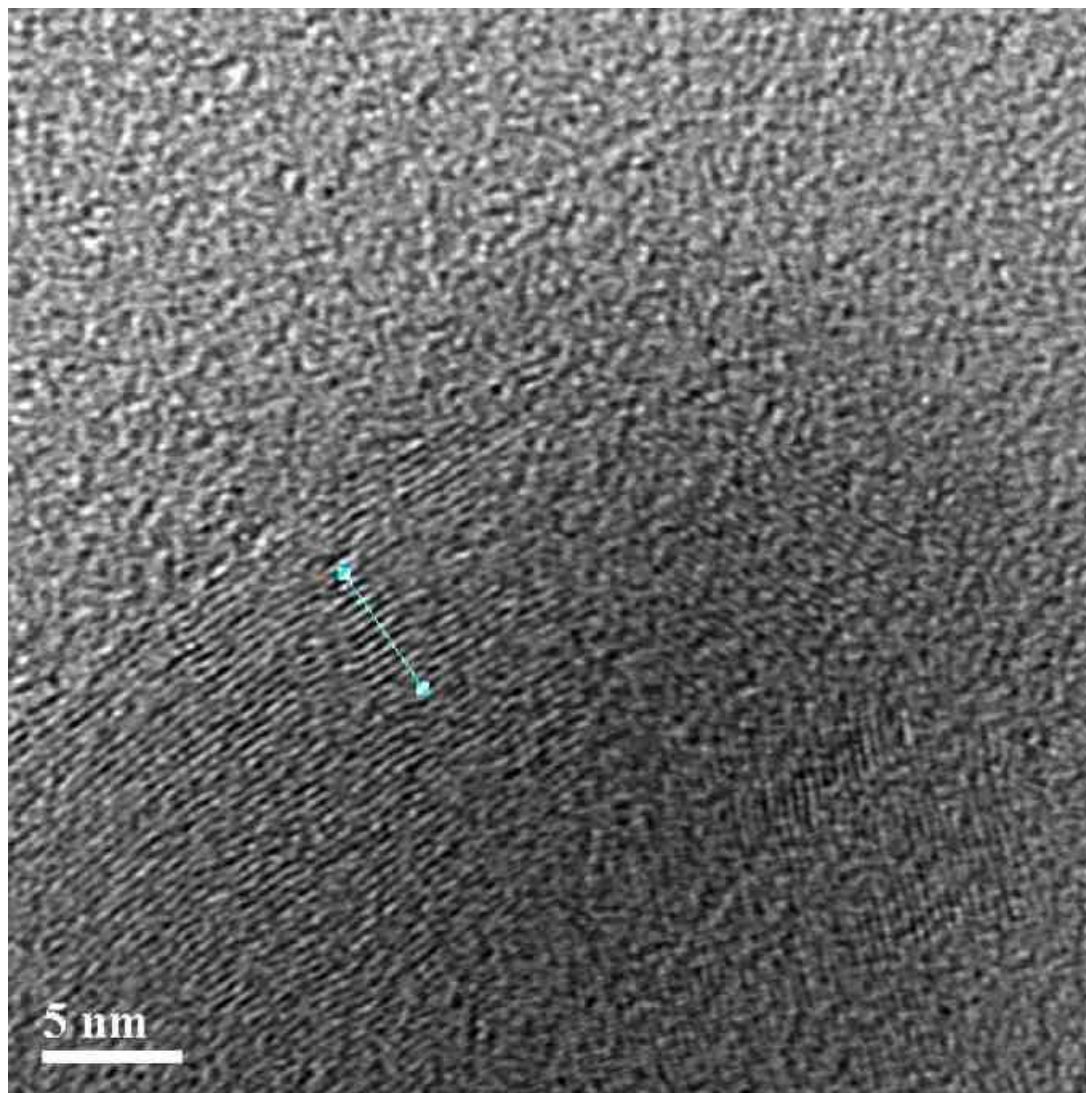

**Figure S15.** A highly magnified HRTEM image of the air-exposed nc-Si particles (baum-küchen-like, multi-layered structures, lamellar shapes with  $\sim 0.37$  nm spacing). (Surface profiles at indicated location).



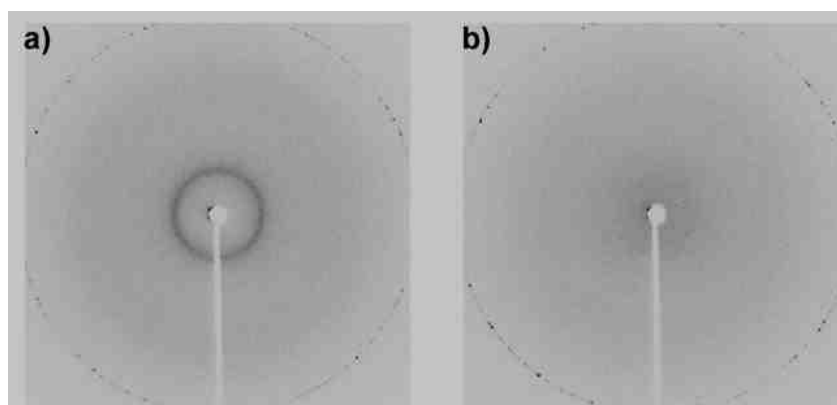

**Figures S15a–b.** Two-dimensional WAXD images of *n*-BSNP: a, before pyrolysis; b, after pyrolysis.

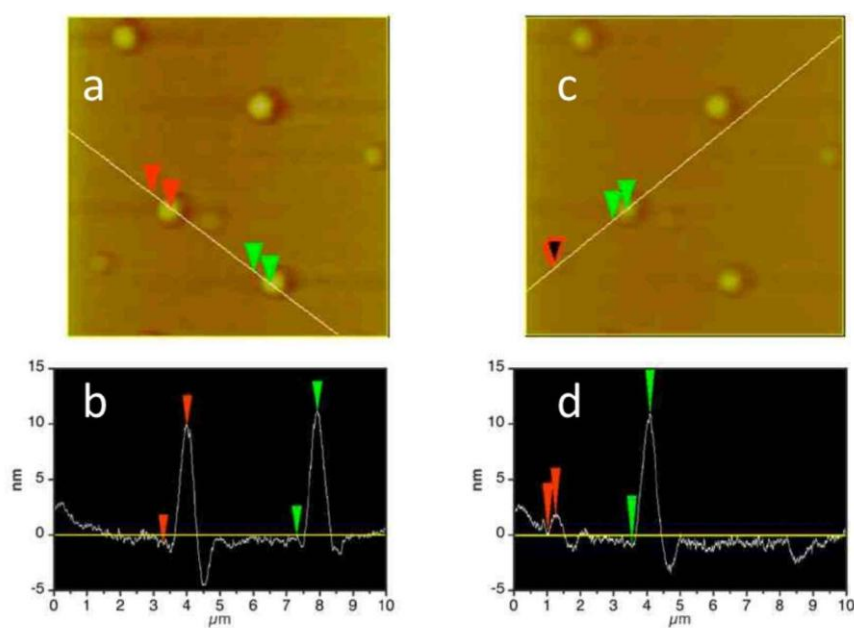

**Figures S16. a–b.** AFM images of the particles deposited on mica with several sizes of flat ring disk shapes, ranging from 1.5 to 10 nm in height and from 0.5 to 1  $\mu\text{m}$  in diameter: **b–d.** Cross-section profiles of a and c, respectively.

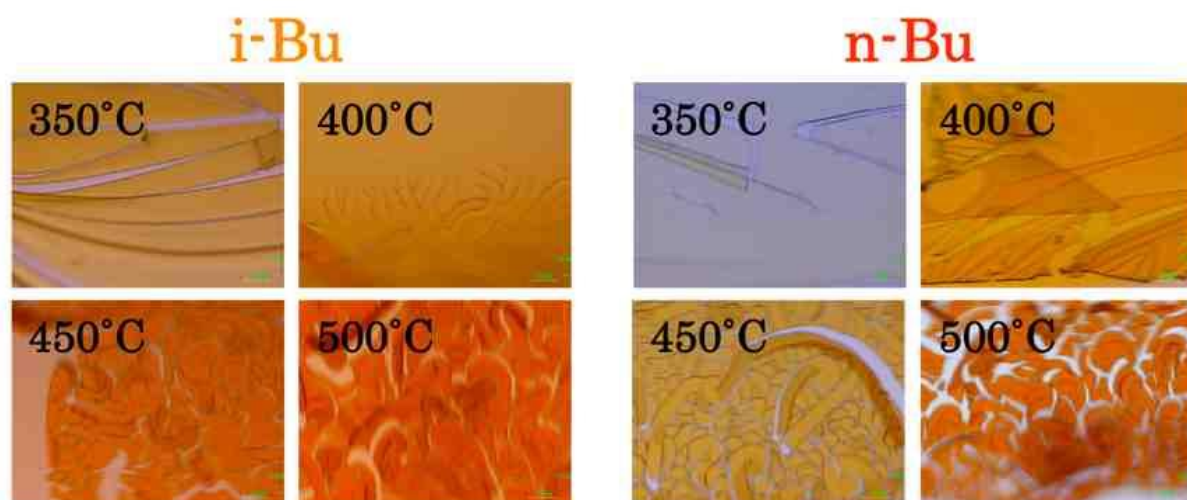

**Figures S17.** Optical microscope (OM) images of *n*-BSNP and *i*-BSNP pyrolyzed at 350, 400, 450, 500 °C, indicating formation of macroscopically curved cracks as temperature increases.

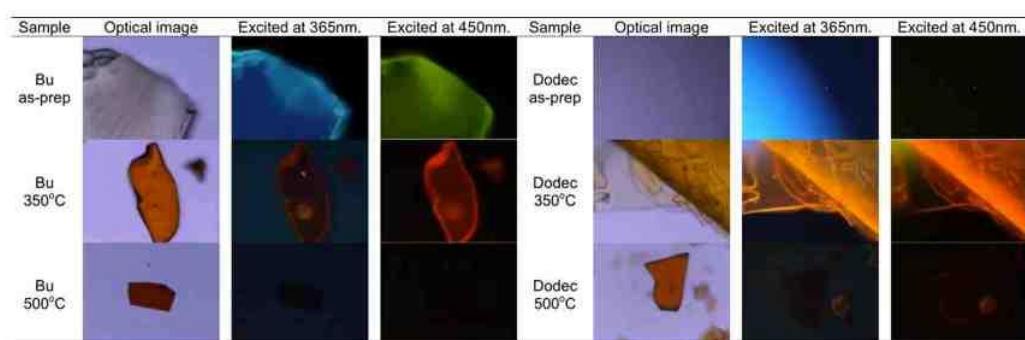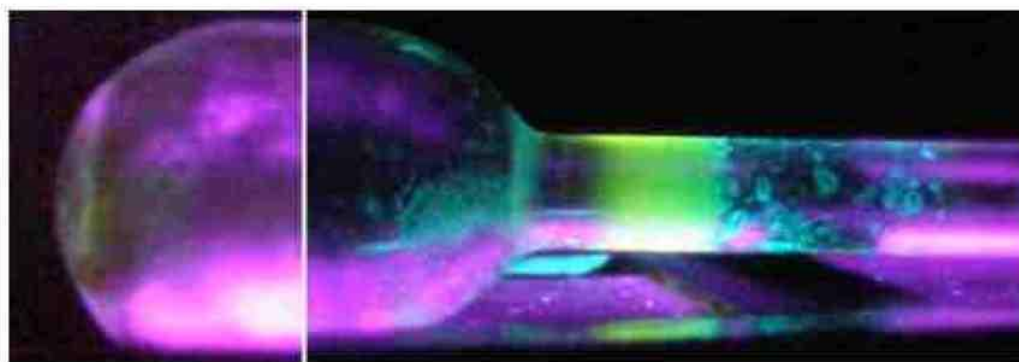

**Figures S18.** Top, FOM images (x 40 magnification) of the pyrolysis samples of *n*-BSNP (top left) and *n*-dodecyl-SNP (top right) at 350 and 500 °C excited at 365 and 450 nm with exposure to air. Bottom, bright visible light emissions from the pyrolytic products of *n*-BSNP deposited onto the inner wall of a sealed quartz tube excited at 365 nm at room temperature.

**Table S1.** Molecular weights of soluble SNPs.<sup>a</sup>

| Sample                                                       | $M_n \times 10^{-4}$ | $M_w \times 10^{-3}$ | PDI  | Yield (%)    |
|--------------------------------------------------------------|----------------------|----------------------|------|--------------|
| EtSNP                                                        | 3.7                  | 10.2                 | 2.78 | undetermined |
| <i>n</i> -PrSNP                                              | 5.4                  | 18.7                 | 3.49 | 37           |
| <i>n</i> -BuSNP ( <i>n</i> -BSNP)                            | 8.9                  | 42.4                 | 4.75 | 39           |
| <i>n</i> -PenSNP                                             | 6.6                  | 17.5                 |      | undetermined |
| <i>n</i> -HexSNP                                             | 6.6                  | 19.8                 | 3.00 | undetermined |
| <i>n</i> -OctSNP                                             | 5.7                  | 13.9                 | 2.46 | undetermined |
| <i>n</i> -DecSNP                                             | 4.4                  | 7.7                  | 1.75 | undetermined |
| <i>n</i> -Dodec-SNP                                          | 4.7                  | 6.8                  | 1.45 | undetermined |
| <i>i</i> -BuSNP ( <i>i</i> -BSNP)                            | 2.4                  | 4.0                  | 1.67 | 18           |
| CF <sub>3</sub> (CH <sub>2</sub> ) <sub>2</sub> -SNP (FPSNP) | 2.8                  | 3.1                  | 1.10 | undetermined |

<sup>a</sup> Calibrated against polystyrene standards.
